# Supplementary material for: The Effectiveness of Interactive Dashboards to Optimise Antibiotic Prescribing in Primary Care: A Systematic Review
Source: MDPI journal article supplement (doi:10.3390/antibiotics12010136), 2023-01-10
Supplement: s1 [file s1]

**Table S1. List of studies excluded and reasons for their exclusion**

| <b>n</b> | <b>Authors/year</b>    | <b>Title</b>                                                                                                                                                                                                      | <b>Reason for exclusion</b>                                                                                                                                                                                                                                         |
|----------|------------------------|-------------------------------------------------------------------------------------------------------------------------------------------------------------------------------------------------------------------|---------------------------------------------------------------------------------------------------------------------------------------------------------------------------------------------------------------------------------------------------------------------|
| [1]      | Gentry et al., 2019    | A 20/20 vision: Successful integration of a prescribing dashboard for outpatient antimicrobial stewardship to target 20% reduction by the year 2020                                                               | Conference abstract                                                                                                                                                                                                                                                 |
| [2]      | Gonzales et al., 2013  | A cluster randomized trial of decision support strategies for reducing antibiotic use in acute bronchitis                                                                                                         | Intervention group was a computerized decision support (CDS) strategy integrated into the workflow of an electronic health record (HER). It does not describe a visual analytics tool                                                                               |
| [3]      | DiBardino et al., 2012 | An electronic checklist vs. prompting physicians to decrease empirical antibiotic utilization                                                                                                                     | Setting: intensive care unit (ICU)<br>Intervention: an EHR-based checklist to a face-to-face physician prompter. It does not describe a visual analytics tool                                                                                                       |
| [4]      | Rutten et al., 2022    | An Electronic Health Record Integrated Decision Tool and Supportive Interventions to Improve Antibiotic Prescribing for Urinary Tract Infections in Nursing Homes: A Cluster Randomized Controlled Trial          | Intervention: EHR-integrated decision tool. It does not describe a visual analytics tool                                                                                                                                                                            |
| [5]      | Gjelstad et al., 2006  | Can antibiotic prescriptions in respiratory tract infections be improved? A cluster-randomized educational intervention in general practice - The Prescription Peer Academic Detailing (Rx-PAD) Study NCT00272155 | Intervention: The elements of the intervention are discussions within the peer group, collection of individual prescription data, audit based on individual feedback reports, as well as a one-day regional work-shop. It does not describe a visual analytics tool |
| [6]      | Gulliford et al., 2011 | Cluster randomized trials utilizing primary care electronic health records: methodological issues in design, conduct, and analysis (eCRT Study).                                                                  | Intervention is a decision support tool incorporated consultation system, which was activated when the family physician entered a medical code for the                                                                                                              |

| <b>n</b> | <b>Authors/year</b>    | <b>Title</b>                                                                                                                                                                                         | <b>Reason for exclusion</b>                                                                                                                                                                                                                                                                                                                                                                     |
|----------|------------------------|------------------------------------------------------------------------------------------------------------------------------------------------------------------------------------------------------|-------------------------------------------------------------------------------------------------------------------------------------------------------------------------------------------------------------------------------------------------------------------------------------------------------------------------------------------------------------------------------------------------|
|          |                        |                                                                                                                                                                                                      | respiratory tract infection. It does not describe a visual analytics tool                                                                                                                                                                                                                                                                                                                       |
| [7]      | Feldstein et al., 2017 | Design and implementation of electronic health record integrated clinical prediction rules (iCPR): a randomized trial in diverse primary care settings                                               | Intervention is a decision support tool incorporated system, the participant then received an alert that, if accepted, would reveal the risk calculator. It does not describe a visual analytics tool.                                                                                                                                                                                          |
| [8]      | Palin et al., 2020     | Developing the infrastructure to support the optimisation of antibiotic prescribing using the learning healthcare system to improve healthcare services in the provision of primary care in England. | It is not an experimental study (i.e., No intervention) Mainly data analytics to form dashboards.                                                                                                                                                                                                                                                                                               |
| [9]      | Litvin et al., 2011    | Development and implementation of a clinical decision support system to promote judicious use of antibiotics in primary care                                                                         | Conference abstract                                                                                                                                                                                                                                                                                                                                                                             |
| [10]     | Linder et al., 2009    | Documentation-based clinical decision support to improve antibiotic prescribing for acute respiratory infections in primary care: a cluster randomised controlled trial                              | Intervention is a decision support tool incorporated the Notes page of the HER. The ARI Smart Form includes 6 components: entry of clinical information; patient data display; diagnosis selection; presentation of treatment options with integrated decision support; printing of patient handouts; and access to supporting medical literature. It does not describe a visual analytics tool |
| [11]     | Gulliford et al., 2019 | Electronically delivered interventions to reduce antibiotic prescribing for respiratory infections in primary care: cluster RCT using electronic health records and cohort study                     | Intervention included a decision support tool were deployed remotely into existing practice software to provide patient information sheets and advice on the positive indications for antibiotic prescription                                                                                                                                                                                   |

| <b>n</b> | <b>Authors/year</b>          | <b>Title</b>                                                                                                                                                                                                    | <b>Reason for exclusion</b>                                                                                                                                                                                                                                                                |
|----------|------------------------------|-----------------------------------------------------------------------------------------------------------------------------------------------------------------------------------------------------------------|--------------------------------------------------------------------------------------------------------------------------------------------------------------------------------------------------------------------------------------------------------------------------------------------|
|          |                              |                                                                                                                                                                                                                 | during consultations for respiratory infection. It does not describe a visual analytics tool                                                                                                                                                                                               |
| [12]     | Blair et al., 2017           | Feasibility cluster randomised controlled trial of a within-consultation intervention to reduce antibiotic prescribing for children presenting to primary care with acute respiratory tract infection and cough | Intervention: a within-consultation interactive web-based tool, which also provided a data collection tool. It does not describe a visual analytics tool                                                                                                                                   |
| [13]     | Lesprit & Brun-Buisson, 2008 | Hospital antibiotic stewardship                                                                                                                                                                                 | Type of study: narrative review                                                                                                                                                                                                                                                            |
| [14]     | Mainous et al., 2013         | Impact of a clinical decision support system on antibiotic prescribing for acute respiratory infections in primary care: quasi-experimental trial                                                               | Intervention was a Clinical decision support system as a HER progress note template to be available at the point of care. It does not describe a visual analytics tool                                                                                                                     |
| [15]     | Bourgeois et al., 2010       | Impact of a computerized template on antibiotic prescribing for acute respiratory infections in children and adolescents                                                                                        | Intervention was a Clinical decision support system with reminders and visit note template. It does not describe a visual analytics tool                                                                                                                                                   |
| [16]     | Diaz et al., 2020            | Impact of a Personalized Audit and Feedback Intervention on Antibiotic Prescribing Practices for Outpatient Pediatric Community-Acquired Pneumonia                                                              | Intervention arm received monthly feedback via a secure closed-messaging system within the EMR (InBasket messaging) about management of a case of CAP that provider saw the month prior based on manual chart review by 1 of 2 investigators. It does not describe a visual analytics tool |
| [17]     | Moulin et al., 2021          | Impact of weekly clinical audits and feedback on consumption of protected anti-gram negative antibiotics in 8 hospitals of the French-speaking part of Switzerland                                              | Conference abstract                                                                                                                                                                                                                                                                        |

| <b>n</b> | <b>Authors/year</b>         | <b>Title</b>                                                                                                                                                                                                                                          | <b>Reason for exclusion</b>                                                                                                                                                                                                                                           |
|----------|-----------------------------|-------------------------------------------------------------------------------------------------------------------------------------------------------------------------------------------------------------------------------------------------------|-----------------------------------------------------------------------------------------------------------------------------------------------------------------------------------------------------------------------------------------------------------------------|
| [18]     | Chan et al., 2015           | Improvement in the appropriateness of outpatient antibiotics prescription: From the role of pharmacist                                                                                                                                                | Conference abstract                                                                                                                                                                                                                                                   |
| [19]     | Juszczyk et al., 2017       | Incorporating electronic health records data into efficient trial interventions-cluster randomised trial to reduce antibiotic prescribing in primary care                                                                                             | Conference abstract                                                                                                                                                                                                                                                   |
| [20]     | Anyanwu et al., 2020        | Investigating the mechanism of impact of the Quality Premium initiative on antibiotic prescribing in primary care practices in England: a study protocol.                                                                                             | Type of study and intervention: This study adopted a natural experiment approach in investigating the mechanism of impact of the 2015–2016 QP target on antibiotic prescribing in primary care practices in England, with the preceding financial year as the control |
| [21]     | Munck et al., 1999          | Long-lasting improvement in general practitioners' prescribing of antibiotics by means of medical audit.                                                                                                                                              | It does not describe a visual analytics tool based on EHR, the audits was results of actual guidelines on diagnosis and treatment based on the literature.                                                                                                            |
| [22]     | Branch-Elliman et al., 2022 | Promoting de-implementation of inappropriate antimicrobial use in cardiac device procedures by expanding audit and feedback: protocol for hybrid III type effectiveness/implementation quasi-experimental study                                       | Recruitment Status: Enrolling by invitation NCT05020418                                                                                                                                                                                                               |
| [23]     | Stachel et al., 2017        | Promoting judicious antibiotic use: Results of an outpatient-based randomized EMR-generated intervention study                                                                                                                                        | Conference abstract                                                                                                                                                                                                                                                   |
| [24]     | Seume et al., 2021          | Protocol for an 'efficient design' cluster randomised controlled trial to evaluate a complex intervention to improve antibiotic prescribing for CHILdren presenting to primary care with acute COugh and respiratory tract infection: the CHICO study | Protocol research. Correspondence author commented that they are currently writing up the main findings for the final report and publication.                                                                                                                         |
| [25]     | Trautner et al., 2018       | Protocol to disseminate a hospital-site controlled intervention using                                                                                                                                                                                 | Protocol research. Correspondence author                                                                                                                                                                                                                              |

| n    | Authors/year         | Title                                                                                                                                                                                                                          | Reason for exclusion                                                                                                                                                                                                                                                        |
|------|----------------------|--------------------------------------------------------------------------------------------------------------------------------------------------------------------------------------------------------------------------------|-----------------------------------------------------------------------------------------------------------------------------------------------------------------------------------------------------------------------------------------------------------------------------|
|      |                      | audit and feedback to implement guidelines concerning inappropriate treatment of asymptomatic bacteriuria.                                                                                                                     | commented that they have not yet published the main clinical outcomes manuscript.                                                                                                                                                                                           |
| [26] | Mann et al., 2011    | Rationale, design, and implementation protocol of an electronic health record integrated clinical prediction rule (iCPR) randomized trial in primary care.                                                                     | Intervention was a decision support system, (the CPR tool appeared on the provider's screen during a clinical encounter when the provider entered 1 or more keywords in the fields for chief complaint, diagnosis, or orders). It does not describe a visual analytics tool |
| [27] | Catho et al., 2018   | Study protocol for a multicentre, cluster randomised, superiority trial evaluating the impact of computerised decision support, audit and feedback on antibiotic use: the COMPuterized Antibiotic Stewardship Study (COMPASS). | Intervention was decision support system based on guidelines recommendations (The COMPASS CDSS provides recommendations based on local guidelines to physicians prescribing an antimicrobial treatment). It does not describe a visual analytics tool                       |
| [28] | Helou et al., 2020   | Study protocol for an international, multicentre stepped-wedge cluster randomised trial to evaluate the impact of a digital antimicrobial stewardship smartphone application                                                   | Protocol, Recruitment Status: Not yet recruiting NCT03793946                                                                                                                                                                                                                |
| [29] | Kamradt et al., 2018 | Sustainable reduction of antibiotic-induced antimicrobial resistance (ARena) in German ambulatory care: study protocol of a cluster randomised trial                                                                           | It was a multifaceted intervention program for physicians and patients, each arm included three strategies and one of them was Quality circles with data-based feedback for physicians. It does not describe a visual analytics tool                                        |
| [30] | Schulz et al., 2013  | The Use of Best Practice Alerts with the Development of an Antimicrobial Stewardship Navigator to Promote Antibiotic De-escalation in the Electronic Medical Record                                                            | It was a decision support system (alert tool). It does not describe a visual analytics tool                                                                                                                                                                                 |

| <b>n</b> | <b>Authors/year</b>         | <b>Title</b>                                                                                                                                                                                                    | <b>Reason for exclusion</b>                                                                                             |
|----------|-----------------------------|-----------------------------------------------------------------------------------------------------------------------------------------------------------------------------------------------------------------|-------------------------------------------------------------------------------------------------------------------------|
| [31]     | Clegg et al., 2021          | Improving antibiotic prescribing for pediatric acute respiratory tract infections: A cluster randomized trial to evaluate individual versus clinic feedback                                                     | Intervention was an individual peer comparison feedback to group feedback. It does not describe a visual analytics tool |
| [32]     | Waitman et al., 2011        | Adopting real-time surveillance dashboards as a component of an enterprisewide medication safety strategy                                                                                                       | It was a decision support system (alert tool).                                                                          |
| [33]     | Hester et al., 2019         | Timely Data for Targeted Quality Improvement Interventions: Use of a Visual Analytics Dashboard for Bronchiolitis                                                                                               | Type of study: case study                                                                                               |
| [34]     | Chang et al., 2022          | Changing antibiotic prescribing practices in outpatient primary care settings in China: Study protocol for a health information system-based cluster-randomised crossover controlled trial.                     | Protocol:<br>ISRCTN13817256<br>Recruitment status<br>No longer recruiting                                               |
| [35]     | Patel et al., 2020          | Developing a clinician facing metric dashboard to foster self development and personal improvement in primary care                                                                                              | Conference abstract                                                                                                     |
| [22]     | Branch-Elliman et al., 2022 | Promoting de-implementation of inappropriate antimicrobial use in cardiac device procedures by expanding audit and feedback: protocol for hybrid III type effectiveness/implementation quasi-experimental study | Protocol<br>Recruitment Status:<br>Enrolling by invitation                                                              |
| [36]     | Melnick et al., 2022        | User centered clinical decision support to implement initiation of buprenorphine for opioid use disorder in the emergency department: EMBED pragmatic cluster randomized controlled trial                       | Condition: it is not focused on antibiotic prescribing                                                                  |
| [37]     | Pankhurst et al., 2021      | Rapid adaptation of a local healthcare digital system to COVID-19: The experience in Birmingham (UK)                                                                                                            | Type of study: case study<br>Condition: it is not focused on antibiotic prescribing                                     |
| [38]     | Xie et al., 2022            | Effectiveness of clinical dashboards as audit and feedback or clinical decision support tools                                                                                                                   | Type of study:<br>Systematic review                                                                                     |

| n    | Authors/year               | Title                                                                                                                                                   | Reason for exclusion                                                                           |
|------|----------------------------|---------------------------------------------------------------------------------------------------------------------------------------------------------|------------------------------------------------------------------------------------------------|
|      |                            | on medication use and test ordering: a systematic review of randomized controlled trials                                                                |                                                                                                |
| [39] | Pons-Mesquida et al., 2022 | Impact of a system to assist in clinical decision-making in primary healthcare in Catalonia: prescription Self Audit                                    | Type of study: cross-sectional study<br>Condition: it is not focused on antibiotic prescribing |
| [40] | Prasad et al., 2022        | Guiding Efficient, Effective, and Patient-Oriented Electrolyte Replacement in Critical Care: An Artificial Intelligence Reinforcement Learning Approach | Type of study: retrospective study<br>Condition: it is not focused on antibiotic prescribing   |

## References

- Gentry, E.; Kowalkowski, M.; Burns, R.; Sweeney, C.; Collins, C.; Ann Medaris, L.; Spencer, M.; Handy, E.; Davidson, L. A 20/20 Vision: Successful Integration of a Prescribing Dashboard for Outpatient Antimicrobial Stewardship to Target 20% Reduction by the Year 2020. *Open Forum Infect. Dis.* **2019**, *6*, S49–S49, doi:10.1093/ofid/ofz359.109.
- Gonzales, R.; Anderer, T.; McCulloch, C.E.; Maselli, J.H.; Bloom, F.J.; Graf, T.R.; Stahl, M.; Yefko, M.; Molecavage, J.; Metlay, J.P. A Cluster Randomized Trial of Decision Support Strategies for Reducing Antibiotic Use in Acute Bronchitis. *JAMA Intern. Med.* **2013**, *173*, 267, doi:10.1001/jamainternmed.2013.1589.
- DiBardino, D.M.; Weiss, C.H.; Sung, N.; Rho, J.; Collander, B.; Wunderink, R.G. An Electronic Checklist Vs. Prompting Physicians To Decrease Empirical Antibiotic Utilization. In Proceedings of the C24. THIS CAN BE DONE BETTER: QUALITY, SAFETY AND PROCESS IMPROVEMENT IN CRITICAL CARE; American Thoracic Society, May 2012; pp. A4012–A4012.
- Rutten, J.J.S.; van Buul, L.W.; Smalbrugge, M.; Geerlings, S.E.; Gerritsen, D.L.; Natsch, S.; Sloane, P.D.; van der Wouden, J.C.; Twisk, J.W.R.; Hertogh, C.M.P.M. An Electronic Health Record Integrated Decision Tool and Supportive Interventions to Improve Antibiotic Prescribing for Urinary Tract Infections in Nursing Homes: A Cluster Randomized Controlled Trial. *J. Am. Med. Dir. Assoc.* **2022**, *23*, 387–393, doi:10.1016/j.jamda.2021.11.010.
- Gjelstad, S.; Fetveit, A.; Straand, J.; Dalen, I.; Rognstad, S.; Lindbaek, M. Can Antibiotic Prescriptions in Respiratory Tract Infections Be Improved? A Cluster-Randomized Educational Intervention in General Practice - The Prescription Peer Academic Detailing (Rx-PAD) Study [NCT00272155]. *BMC Health Serv. Res.* **2006**, *6*, 1–12, doi:10.1186/1472-6963-6-75.
- Gulliford, M.C.; van Staa, T.; McDermott, L.; Dregan, A.; McCann, G.; Ashworth, M.; Charlton, J.; Grieve, A.P.; Little, P.; Moore, M. V; et al. Cluster Randomised Trial in the General Practice Research Database: 1. Electronic Decision Support to Reduce Antibiotic Prescribing in Primary Care (ECRT Study). *Trials* **2011**, *12*, 115.
- Feldstein, D.A.; Hess, R.; McGinn, T.; Mishuris, R.G.; McCullagh, L.; Smith, P.D.; Flynn, M.; Palmisano, J.; Doros, G.; Mann, D. Design and Implementation of Electronic Health Record Integrated Clinical Prediction Rules (ICPR): A Randomized Trial in Diverse Primary Care Settings. *Implement. Sci.* **2017**, *12*, 1–11, doi:10.1186/s13012-017-0567-y.
- Palin, V.; Tempest, E.; Mistry, C.; Van Staa, T.P. Developing the Infrastructure to Support the Optimisation of Antibiotic Prescribing Using the Learning Healthcare System to Improve Healthcare Services in the

Provision of Primary Care in England. *BMJ Heal. Care Informatics* **2020**, *27*, 1–5, doi:10.1136/bmjhci-2020-100147.

9. Litvin, C.; Wessell, A.M.; Nemeth, L.; Mainous, A.G.; Ornstein, S.M. Development and Implementation of a Clinical Decision Support System to Promote Judicious Use of Antibiotics in Primary Care. *J. Investig. Med.* **2011**, *59*, 536, doi:10.231/JIM.0b013e31820bab4c LK - <http://jq6am9xs3s.search.serialssolutions.com/?sid=EMBASE&issn=10815589&id=doi:10.231%2FJIM.0b013e31820bab4c&atitle=Development+and+implementation+of+a+clinical+decision+support+system+to+promote+judicious+use+of+antibiotics+in+primary+care&stitle=J.+Invest.+Med.&title=Journal+of+Investigative+Medicine&volume=59&issue=2&spage=536&epage=&aulast=Litvin&aufirst=C.&auinit=C.&aufull=Litvin+C.&coden=&isbn=&pages=536-&date=2011&auinit1=C&auinitm=>.
10. Linder, J.A.; Schnipper, J.L.; Tsurikova, R.; Yu, T.; Volk, L.A.; Melnikas, A.J.; Palchuk, M.B.; Olsha-Yehiav, M.; Middleton, B. Documentation-Based Clinical Decision Support to Improve Antibiotic Prescribing for Acute Respiratory Infections in Primary Care: A Cluster Randomised Controlled Trial. *Inform. Prim. Care* **2009**, *17*, 231–240, doi:10.14236/jhi.v17i4.742.
11. Gulliford, M.C.; Prevost, A.T.; Charlton, J.; Juszczak, D.; Soames, J.; McDermott, L.; Sultana, K.; Wright, M.; Fox, R.; Hay, A.D.; et al. Effectiveness and Safety of Electronically Delivered Prescribing Feedback and Decision Support on Antibiotic Use for Respiratory Illness in Primary Care: REDUCE Cluster Randomised Trial. *BMJ* **2019**, *364*, doi:10.1136/bmj.l236.
12. Blair, P.S.; Turnbull, S.; Ingram, J.; Redmond, N.; Lucas, P.J.; Cabral, C.; Hollinghurst, S.; Dixon, P.; Peters, T.; Horwood, J.; et al. Feasibility Cluster Randomised Controlled Trial of a Within-Consultation Intervention to Reduce Antibiotic Prescribing for Children Presenting to Primary Care with Acute Respiratory Tract Infection and Cough. *BMJ Open* **2017**, *7*, 1–11, doi:10.1136/bmjopen-2016-014506.
13. Lesprit, P.; Brun-Buisson, C. Hospital Antibiotic Stewardship. *Curr. Opin. Infect. Dis.* **2008**, *21*, 344–349, doi:10.1097/QCO.0b013e3283013959.
14. Mainous, A.G.; Lambourne, C.A.; Nietert, P.J. Impact of a Clinical Decision Support System on Antibiotic Prescribing for Acute Respiratory Infections in Primary Care: Quasi-Experimental Trial. *J. Am. Med. Informatics Assoc.* **2013**, *20*, 317–324, doi:10.1136/amiajnl-2011-000701.
15. Bourgeois, F.C.; Linder, J.; Johnson, S.A.; Co, J.P.T.; Fiskio, J.; Ferris, T.G. Impact of a Computerized Template on Antibiotic Prescribing for Acute Respiratory Infections in Children and Adolescents. *Clin. Pediatr. (Phila)*. **2010**, *49*, 976–983, doi:10.1177/0009922810373649.
16. Diaz, M.C.G.; Handy, L.K.; Crutchfield, J.H.; Cadilla, A.; Hossain, J.; Werk, L.N. Impact of a Personalized Audit and Feedback Intervention on Antibiotic Prescribing Practices for Outpatient Pediatric Community-Acquired Pneumonia. *Clin. Pediatr. (Phila)*. **2020**, *59*, 988–994, doi:10.1177/0009922820928054.
17. Moulin, E.; Plüss Suard, C.; Bellini, C.; Christin, L.; Chuard, C.; Clerc, O.; Cometta, A.; Erard, V.; Marchetti, O.; Troillet, N.; et al. Impact of Weekly Clinical Audits and Feedback on Consumption of Protected Anti-Gram Negative Antibiotics in 8 Hospitals of the French-Speaking Part of Switzerland. *Antimicrob. Resist. Infect. Control* **2021**, *10*, doi:10.1186/s13756-021-00974-z0 LK - <http://jq6am9xs3s.search.serialssolutions.com/?sid=EMBASE&issn=20472994&id=doi:10.1186%2F%2Fs13756-021-00974-z0&atitle=Impact+of+weekly+clinical+audits+and+feedback+on+consumption+of+protected+anti-gram+negative+antibiotics+in+8+hospitals+of+the+French-speaking+part+of+Switzerland&stitle=Antimicrob.+Resist.+Infect.+Control&title=Antimicrobial+Resistance+and+Infection+Control&volume=10&issue=SUPPL+1&spage=&epage=&aulast=Moulin&aufirst=E.&auinit=E.&aufull=Moulin+E.&c=>.
18. Chan, Y.H.; Leu, W.-J.; Tsai, C.-S.; Huang, S.-Y.; Lin, Y.-M. Improvement in the Appropriateness of Outpatient Antibiotics Prescription: From the Role of Pharmacist. *Pharmacotherapy* **2015**, *35*, e249, doi:10.1002/phar.1659 LK - <http://jq6am9xs3s.search.serialssolutions.com/?sid=EMBASE&issn=02770008&id=doi:10.1002%2Fphar.1659&atitle=Improvement+in+the+appropriateness+of+outpatient+antibiotics+prescription%3A+From+the+role+of+pharmacist&stitle=Pharmacotherapy&title=Pharmacotherapy&volume=35&issue=11&spage=e249&epage=&aulast=Chan&aufirst=Yi+Harn&auinit=Y.H.&aufull=Chan+Y.H.&coden=&isbn=&pages=e249->



&date=2015&auinitl=Y&auinitm=H.

19. Juszczuk, D.; Charlton, J.; Gulliford, M.C. Incorporating Electronic Health Records Data into Efficient Trial Interventions-Cluster Randomised Trial to Reduce Antibiotic Prescribing in Primary Care. In Proceedings of the TRIALS; BIOMED CENTRAL LTD 236 GRAYS INN RD, FLOOR 6, LONDON WC1X 8HL, ENGLAND, 2017; Vol. 18.
20. Anyanwu, P.E.; Pouwels, K.; Walker, A.; Moore, M.; Majeed, A.; J Hayhoe, B.W.; Tonkin-Crine, S.; Borek, A.; Hopkins, S.; Mcleod, M.; et al. Investigating the Mechanism of Impact and Differential Effect of the Quality Premium Scheme on Antibiotic Prescribing in England: A Longitudinal Study. *BJGP Open* **2020**, *4*, 1–12, doi:10.3399/bjgpopen20X101052.
21. Munck, A.P.; Gahrn-Hansen, B.; Søgaaard, P.; Søgaaard, J. Long-Lasting Improvement in General Practitioners' Prescribing of Antibiotics by Means of Medical Audit. *Scand. J. Prim. Health Care* **1999**, *17*, 185–190, doi:10.1080/028134399750002629.
22. Branch-Elliman, W.; Lamkin, R.; Shin, M.; Mull, H.J.; Epshtein, I.; Golenbock, S.; Schweizer, M.L.; Colborn, K.; Rove, J.; Strymish, J.M.; et al. Promoting De-Implementation of Inappropriate Antimicrobial Use in Cardiac Device Procedures by Expanding Audit and Feedback: Protocol for Hybrid III Type Effectiveness/Implementation Quasi-Experimental Study. *Implement. Sci.* **2022**, *17*, 1–12, doi:10.1186/s13012-022-01186-8.
23. Stachel, A.; Szerencsy, A.; Pulgarin, C.; Fucito, N.; Pham, V. Promoting Judicious Antibiotic Use: Results of an Outpatient-Based Randomized EMR-Generated Intervention Study. *Open Forum Infect. Dis.* **2017**, *4*, S273–S274, doi:10.1093/ofid/ofx163.609.
24. Seume, P.; Bevan, S.; Young, G.; Ingram, J.; Clement, C.; Cabral, C.; Lucas, P.J.; Beech, E.; Taylor, J.; Horwood, J.; et al. Protocol for an “efficient Design” Cluster Randomised Controlled Trial to Evaluate a Complex Intervention to Improve Antibiotic Prescribing for CHildren Presenting to Primary Care with Acute COugh and Respiratory Tract Infection: The CHICO Study. *BMJ Open* **2021**, *11*, 1–9, doi:10.1136/bmjopen-2020-041769.
25. Trautner, B.W.; Prasad, P.; Grigoryan, L.; Hysong, S.J.; Kramer, J.R.; Rajan, S.; Petersen, N.J.; Rosen, T.; Drekonja, D.M.; Graber, C.; et al. Protocol to Disseminate a Hospital-Site Controlled Intervention Using Audit and Feedback to Implement Guidelines Concerning Inappropriate Treatment of Asymptomatic Bacteriuria. *Implement. Sci.* **2018**, *13*, 1–11, doi:10.1186/s13012-018-0709-x.
26. Mann, D.M.; Kannry, J.L.; Edonyabo, D.; Li, A.C.; Arciniega, J.; Stulman, J.; Romero, L.; Wisnivesky, J.; Adler, R.; McGinn, T.G. Rationale, Design, and Implementation Protocol of an Electronic Health Record Integrated Clinical Prediction Rule (ICPR) Randomized Trial in Primary Care. *Implement. Sci.* **2011**, *6*, 109, doi:10.1186/1748-5908-6-109.
27. Catho, G.; De Kraker, M.; Waldispühl Suter, B.; Valotti, R.; Harbarth, S.; Kaiser, L.; Elzi, L.; Meyer, R.; Bernasconi, E.; Huttner, B.D. Study Protocol for a Multicentre, Cluster Randomised, Superiority Trial Evaluating the Impact of Computerised Decision Support, Audit and Feedback on Antibiotic Use: The COMPuterized Antibiotic Stewardship Study (COMPASS). *BMJ Open* **2018**, *8*, 1–9, doi:10.1136/bmjopen-2018-022666.
28. Helou, R.I.; Catho, G.; Peyravi Latif, A.; Mouton, J.; Hulscher, M.; Teerenstra, S.; Conly, J.; Huttner, B.D.; Tängdén, T.; Verbon, A. Study Protocol for an International, Multicentre Stepped-Wedge Cluster Randomised Trial to Evaluate the Impact of a Digital Antimicrobial Stewardship Smartphone Application. *BMJ Open* **2020**, *10*, 1–8, doi:10.1136/bmjopen-2019-033640.
29. Kamradt, M.; Kaufmann-Kolle, P.; Andres, E.; Brand, T.; Klingenberg, A.; Glassen, K.; Poß-Doering, R.; Uhlmann, L.; Hees, K.; Weber, D.; et al. Sustainable Reduction of Antibiotic-Induced Antimicrobial Resistance (ARena) in German Ambulatory Care: Study Protocol of a Cluster Randomised Trial. *Implement. Sci.* **2018**, *13*, 1–10, doi:10.1186/s13012-018-0722-0.
30. Schulz, L.; Osterby, K.; Fox, B. The Use of Best Practice Alerts with the Development of an Antimicrobial Stewardship Navigator to Promote Antibiotic De-Escalation in the Electronic Medical Record. *Infect. Control Hosp. Epidemiol.* **2013**, *34*, 1259–1265, doi:10.1086/673977.

31. Clegg, H.W.; Ezzo, S.J.; Flett, K.B.; Anderson, W.E. Improving Antibiotic Prescribing for Pediatric Acute Respiratory Tract Infections: A Cluster Randomized Trial to Evaluate Individual versus Clinic Feedback. *Antimicrob. Steward. Healthc. Epidemiol.* **2021**, *1*, 1–7, doi:10.1017/ash.2021.212.
32. Waitman, L.R.; Phillips, I.E.; McCoy, A.B.; Danciu, I.; Robert, M.; Halpenny, M.S.; Nelsen, C.L.; Johnson, D.C.; Starmer, J.M.; Peterson, J.F. Adopting Real-Time Surveillance Dashboards as a Component of an Enterprisewide Medication Safety Strategy. *Jt. Comm. J. Qual. Patient Saf.* **2011**, *37*, 326–332, doi:10.1016/s1553-7250(11)37041-9.
33. Hester, G.; Lang, T.; Madsen, L.; Tambyraja, R.; Zenker, P. Timely Data for Targeted Quality Improvement Interventions: Use of a Visual Analytics Dashboard for Bronchiolitis. *Appl. Clin. Inform.* **2019**, *10*, 168–174, doi:10.1055/s-0039-1679868.
34. Chang, Y.; Yao, Y.; Cui, Z.; Yang, G.; Li, D.; Wang, L.; Tang, L. Changing Antibiotic Prescribing Practices in Outpatient Primary Care Settings in China: Study Protocol for a Health Information System-Based Cluster-Randomised Crossover Controlled Trial. *PLoS One* **2022**, *17*, e0259065, doi:10.1371/journal.pone.0259065.
35. Patel, T.; Davis, P.; Faldon, L. 70 Developing a Clinician Facing Metric Dashboard to Foster Self Development and Personal Improvement in Primary Care. In Proceedings of the Abstracts; BMJ Publishing Group Ltd, November 16 2020; Vol. 4, p. A26.2-A26.
36. Melnick, E.R.; Nath, B.; Dziura, J.D.; Casey, M.F.; Jeffery, M.M.; Paek, H.; Soares, W.E.; Hoppe, J.A.; Rajeevan, H.; Li, F.; et al. User Centered Clinical Decision Support to Implement Initiation of Buprenorphine for Opioid Use Disorder in the Emergency Department: EMBED Pragmatic Cluster Randomized Controlled Trial. *BMJ* **2022**, *377*, e069271, doi:10.1136/bmj-2021-069271.
37. Pankhurst, T.; Atia, J.; Evison, F.; Gallier, S.; Lewis, J.M.; McKee, D.; Ryan, S.; Sapey, E.; Ball, S.; Coleman, J.J. Rapid Adaptation of a Local Healthcare Digital System to COVID-19: The Experience in Birmingham (UK). *Heal. Policy Technol.* **2021**, *10*, 100568, doi:10.1016/j.hlpt.2021.100568.
38. Xie, C.X.; Chen, Q.; Hincapié, C.A.; Hofstetter, L.; Maher, C.G.; Machado, G.C. Effectiveness of Clinical Dashboards as Audit and Feedback or Clinical Decision Support Tools on Medication Use and Test Ordering: A Systematic Review of Randomized Controlled Trials. *J. Am. Med. Informatics Assoc.* **2022**, *00*, 1–13, doi:10.1093/jamia/ocac094.
39. Pons-Mesquida, M.À.; Oms-Arias, M.; Figueras, A.; Diogène-Fadini, E. Impact of a System to Assist in Clinical Decision-Making in Primary Healthcare in Catalonia: Prescription Self Audit. *BMC Med. Inform. Decis. Mak.* **2022**, *22*, 1–12, doi:10.1186/s12911-022-01809-6.
40. Prasad, N.; Mandyam, A.; Chivers, C.; Draugelis, M.; Hanson, C.W.; Engelhardt, B.E.; Laudanski, K. Guiding Efficient, Effective, and Patient-Oriented Electrolyte Replacement in Critical Care: An Artificial Intelligence Reinforcement Learning Approach. *J. Pers. Med.* **2022**, *12*, doi:10.3390/jpm12050661.
