# Supplementary material for: The Effectiveness of Interactive Dashboards to Optimise Antibiotic Prescribing in Primary Care: A Systematic Review
Source: Antibiotics (Basel). 2023 Jan 10;12(1):136. doi: 10.3390/antibiotics12010136 (PMC9854857; doi:10.3390/antibiotics12010136)
Supplement: Supplementary file 1 [file antibiotics-12-00136-s001.zip]

Archive with 6 entries (6 files):
- Table S1 - List of studies excluded and reasons for their exclusion.pdf
- Table S2 - Characteristics of studies included.pdf
- Table S3 - Result of outcomes.pdf
- Table S4 - Risk of bias in included studies.pdf
- Table S5 - GRADE assessment.pdf
- Table S6 - Electronic search report.pdf
